# Supplementary material
Source: PubMed Central journal article supplement (PMC6913911)
Supplement: NIHMS1044954-supplement-Supplemental_table.pdf [file NIHMS1044954-supplement-Supplemental_table.pdf]

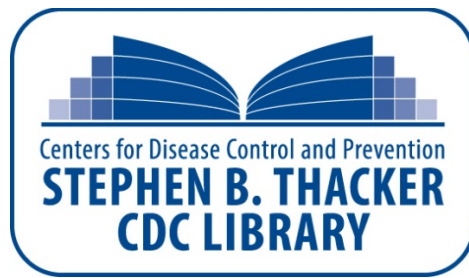

## Interlibrary Loans and Journal Article Requests

### **Notice Warning Concerning Copyright Restrictions:**

The copyright law of the United States (Title 17, United States Code) governs the making of photocopies or other reproductions of copyrighted materials.

Under certain conditions specified in the law, libraries and archives are authorized to furnish a photocopy or other reproduction. One specified condition is that the photocopy or reproduction is not to be *“used for any purpose other than private study, scholarship, or research.”* If a user makes a request for, or later uses, a photocopy or reproduction for purposes in excess of “fair use,” that user may be liable for copyright infringement.

Upon receipt of this reproduction of the publication you have requested, you understand that the publication may be protected by copyright law. You also understand that you are expected to comply with copyright law and to limit your use to one for private study, scholarship, or research and not to systematically reproduce or in any way make available multiple copies of the publication.

**The Stephen B. Thacker CDC Library reserves the right to refuse to accept a copying order if, in its judgment, fulfillment of the order would involve violation of copyright law.**

### **Terms and Conditions for items sent by e-mail:**

The contents of the attached document may be protected by copyright law. The [CDC copyright policy](#) outlines the responsibilities and guidance related to the reproduction of copyrighted materials at CDC. If the document is protected by copyright law, the following restrictions apply:

- You may print only one paper copy, from which you may not make further copies, except as maybe allowed by law.
- You may not make further electronic copies or convert the file into any other format.
- You may not cut and paste or otherwise alter the text.

| <b>Supplemental Table 1. Adjusted, weighted percentages of underemployment (sustained unemployment/employment reductions) among individuals with and without cancer history</b> |                                              |               |
|---------------------------------------------------------------------------------------------------------------------------------------------------------------------------------|----------------------------------------------|---------------|
|                                                                                                                                                                                 | <b>Adjusted, Weighted Predicted Marginal</b> | <b>95% CI</b> |
| <b>Men</b>                                                                                                                                                                      |                                              |               |
| Unmarried (non-cancer)                                                                                                                                                          | 18.9                                         | 17.8-20.1     |
| Married (non-cancer)                                                                                                                                                            | 14.0                                         | 13.1-15.0     |
| Dx 1-5 years ago, unmarried                                                                                                                                                     | 31.0                                         | 22.1-41.5     |
| Dx 1-5 years ago, married                                                                                                                                                       | 21.6                                         | 16.0-28.6     |
| Dx 6-10 years ago, unmarried                                                                                                                                                    | 26.2                                         | 16.7-38.6     |
| Dx 6-10 years ago, married                                                                                                                                                      | 22.5                                         | 15.2-32.1     |
| Dx >10 years ago, unmarried                                                                                                                                                     | 23.4                                         | 16.9-31.5     |
| Dx >10 years ago, married                                                                                                                                                       | 21.0                                         | 14.1-30.1     |
| <b>Women</b>                                                                                                                                                                    |                                              |               |
| Unmarried (non-cancer)                                                                                                                                                          | 18.3                                         | 17.4-19.3     |
| Married (non-cancer)                                                                                                                                                            | 32.4                                         | 31.4-33.6     |
| Dx 1-5 years ago, unmarried                                                                                                                                                     | 18.7                                         | 14.1-24.4     |
| Dx 1-5 years ago, married                                                                                                                                                       | 30.1                                         | 24.6-36.3     |
| Dx 6-10 years ago, unmarried                                                                                                                                                    | 15.2                                         | 10.6-21.2     |
| Dx 6-10 years ago, married                                                                                                                                                      | 36.8                                         | 29.8-44.4     |
| Dx >10 years ago, unmarried                                                                                                                                                     | 18.1                                         | 13.7-23.6     |
| Dx >10 years ago, married                                                                                                                                                       | 38.7                                         | 32.4-45.3     |

Data source: Medical Expenditure Panel Survey, Panels 12-17 (2007-2013)

Adjusted, weighted percentages of underemployment (sustained unemployment/employment reductions) among individuals with and without cancer history. DX = diagnosed. Adjusted for age at survey, race/ethnicity, education, household income, minors in household, comorbidities, Metropolitan Statistical Area, and Panel Number (see Table 2).
